# Supplementary material for: Accurate Alternative Measurements for Female Lifetime Reproductive Success in Drosophila melanogaster
Source: PLoS One. 2015 Jun 30;10(6):e0116679. doi: 10.1371/journal.pone.0116679 (PMC4488368; doi:10.1371/journal.pone.0116679)
Supplement: S4 Table — (XLSX) [file pone.0116679.s004.xlsx]

## Sheet: Description
Single male and female pairs were observed and allowed to copulate one time; after copulation the male was removed.
The number of offspring produced were counted until no more offspring eclosed.
Crosses are listed as females x males.
There are 20 replicates.

## Sheet: Rep 1
		Cryptic female choice
DATE		cross
		Female Line 1					Female Line 2					Female Line 3							Female Line 5						Female Line 6					Female Line 7						Female Line 8					Female Line 9				Female Line 10
		F1xM1	F1XM7	F1XM8	F1XM9	F1XM10	F2XM1	F2XM2	F2XM3	F2XM7	F2XM10	F3XM1	F3XM2	F3XM3	F3XM5	F3XM6	F3XM8	F3XM10	F5XM1	F5XM5	F5XM7	F5XM8	F5XM9	F5XM10	F6XM1	F6XM2	F6XM6	F6XM8	F6XM9	F7XM1	F7XM2	F7XM5	F7XM7	F7XM8	F7XM9	F8XM1	F8XM3	F8XM7	F8XM8	F8XM10	F9XM2	F9XM5	F9XM6	F9XM8	F10XM2	F10XM3	F10XM8	F10XM9
2014-04-13			13	6		4	5	4		10		11	4	4		11	7	24	7	8		14	9	1	13	13	8	19	12	16	14	11	2			3	9	8	3	4	14	7	5		15			1
2014-04-14		10		9	6	16	15	8		14		3	2	3	7	15	2	11	12	9		9	18	15	3	2	8	8	6	27	4	11	4			7	13	4	8	10	25	6	37	3	5			15
2014-04-15		11	11	14	20	17	12	10		14		11	7	9	6	8	10	12	10	20		16	2	2	6	5	8	11	4	3	9	25	8	1		8	7		6	16	2	14	3	10	2		6	5
2014-04-16		14	10	13	20	9	10	11		8		22	15	13	5	11	17	11	9	14		16	8	9	12		12	11	14	11	7	10	16	14		14	4	9	13	17	7	1	9	10	22		12	12
2014-04-17		9	13	18	4	12	9	4		6		8	6	7	5	12	9	6	10	12		4	3	2	5		8	9	13	2	5	10	14	5		7	6	12	5	10	2	13	6	3	7		8	13
2014-04-18		18	20	26	1	17	8	15		14		11	15	8	6	15	12	10	9	17		12	14	11	7		12	13	16	10	14	9	12	5		10	1	9	8	8	2	7	6	16	1		11	5
2014-04-19		7	8	28	1	14	9	10		11		14	14	14	4	7	19	14	11	11		10	7	4	7		9	11	7	11	10	12	12	12		8	5	3	13	16		13	11				17	11
2014-04-20	front	15	17	23	4	22	6	13		7		23	15	7	5	15	11	10	8	13		12	12	2	2		13	9	1	5	7	12	13	17		6	5	7	8	17	4	4	7				14	3
2014-04-20	back		1									10	8	4	1	1	1	9	2			6	6	3	1	3	4	7	6		8	8		1		5	1	17		1		4					3
2014-04-21	front	7	14	8	1	14	2	2		5		8	4	7	1	13	2	7	6	5		3	5		6			5	2	1	7	6	6	4		1	10	15	7	2	11	1	2				10	1
2014-04-21	back	15	20			2						10	14	12	2	19	1	4	9			1	10	4	10	10	19	16	13	19	2	14	4	24		7	6	9	19	1	23	15					22	6
2014-04-22	front	1	4	3		5	3	8		2		1	8	3	1	4	3	3	9			6	2		2		1	10	1	5	6	5	6	3		1	2	13	3	1		1					8	1
2014-04-22	back	9								4		7	4	7	2	13			4	16		25	1	3	5	1	2	7	3	7	7	1	13	12		12	5	7	5		4	4					6	9
2014-04-23	front	4	6	7		5	3	10		7		1	1			3	7	3	5			5	4		1		2	6	6	4	1	3	5	1				11	6	1	2	5	1				3	1
2014-04-23	back	3	2	1	3					6		1	2	1	7	7		4	2	14		7	10	5	2	3	11	13	2	15	4	8	8	9		7	8	4	16		7	4					2	10
2014-04-24	front	2	3	7		3		2		5		4	4	5	1	2	10	2	2			3	4				4	10	4	5	6	6	6	3				3	3	3	4	4	4				3
2014-04-24	back	2	8	2	21			1				13		1	3	5		1	6	11		21	7	2		2	1	13		10	5	6	3	16		5	6	2	11		8	11					17	9
2014-04-25	front	7	2	2		3	1	3		8		2	6	7		1	3	5		1		6	2				3	1	1	8	1	4	7	1		1		2	4		7	1	18				3
2014-04-25	back			2	17							7		2	4	3		6	2	7		22	5		2		1	1		7	2	6	1	13		5	5		9		9	9					6	8
2014-04-26	front	4	2			5		2		10		1	4	2		4	1	5	1				1					2		9	2	9	2					1	2		3	2	15
2014-04-26	back	2	1	3								2	1	2	1	3			2	18		12	4		1	1	3	6		4		4		4					9		4	8					4	4
2014-04-27	front																								4
2014-04-27	back	5	3	1								3			5	7			1	1		10			11	4	3	5		2				3		4	2		4		2	3					1	6
2014-04-28	front															2			1						5			2						3		4			9		7	11
2014-04-28	back		5									1		7	8	9									6	4	7	5				2		12	3	4	7		5		6
2014-04-29	front																											5						6		3	4		9		1	4
2014-04-29	back													2	3	8				5					1		3	4		3				12		2	3		10
2014-04-30	front													3					1	7		13			3	3	5	3						9		5	8		8			5
2014-04-30	back													2		3				14		2			3	1	1	6		2				3		1			8		2	6
2014-05-01	front		5	1										1	1					16		3	2		6	1	1	1								6	3		9			1
2014-05-01	back				1										1					1		2					1	3											4
2014-05-02	front		2												2					19		2			2		4							3		2	2		5			4
2014-05-02	back															1									1
2014-05-03	front		1																			1			1		3									5	5					2					3
2014-05-03	back																										1							1
2014-05-04	front													1						1							2						1			2			3			2
2014-05-04	back
2014-05-05	front		1												1										2		2	1								4	2
2014-05-05	back																										2									4
															6					9		6			1		1							12		22	31		1
																									2														3	2							1
Totals		145	172	174	99	148	83	103	0	131	0	174	134	134	88	202	115	147	129	249	0	249	136	63	133	53	165	223	111	186	121	182	143	209	3	175	160	136	236	109	156	172	124	42	52	0	160	120

## Sheet: Rep 2
		Cryptic female choice
DATE		cross
		Female Line 1					Female Line 2					Female Line 3							Female Line 5						Female Line 6					Female Line 7						Female Line 8					Female Line 9				Female Line 10
		F1xM1	F1XM7	F1XM8	F1XM9	F1XM10	F2XM1	F2XM2	F2XM3	F2XM7	F2XM10	F3XM1	F3XM2	F3XM3	F3XM5	F3XM6	F3XM8	F3XM10	F5XM1	F5XM5	F5XM7	F5XM8	F5XM9	F5XM10	F6XM1	F6XM2	F6XM6	F6XM8	F6XM9	F7XM1	F7XM2	F7XM5	F7XM7	F7XM8	F7XM9	F8XM1	F8XM3	F8XM7	F8XM8	F8XM10	F9XM2	F9XM5	F9XM6	F9XM8	F10XM2	F10XM3	F10XM8	F10XM9
2014-04-13		5	12	12	9	3	4	1	8	6	12	8	9		19	17	23		7	11	17	9	2	23	8	25	3	38	6	10	15	7	2	21	13		5	2	1	12		12	11	4	12	23	13	5
2014-04-14		21	20	10	6	11	21	12	10	16	8	2	7		23	5	4		23	4	7	14	18	21	7	4	18	10	23	2	3	7	23	15	4		5	9	12	2	4	11	15	6	10	9	8	30
2014-04-15		15	16	16	14	16	15	6	10	14	20	4	11		3	7	8		8	20	12	14	3	11	22	11	10	4	6	4	13	13	12	15	5		12	9	8	12	6	8	17	7	2	8	12	3
2014-04-16		9	22	17	15	14	7	2	13	16	4	7	17		5	20	5		6	11	14	15	7	11	16	15	18	4	12	6	11	15	13	12	6		19	16	13	16	9	12	14	14	13	16	10	11
2014-04-17		9	12	13	13	18	9	7	5	11	17	2	7		5	8	5		12	12	8	16	6	17	10	6	9	7	2	10	5	8	9	6	8		4	14	12	7	3	13	4	3	3	10	9	4
2014-04-18		19	24	20	10	17	20	9	1	5	13		10		8	7			17	15	18	22	8	25	7	21	14	16	19	11	18	12	23	17	14		18	10	9	11	12	13	10	6	1	8	9	7
2014-04-19		9	24	10	16	13		11	9	5		14	3	4	8		5		4	10	9	3	12	8	14	11	6	7	5	4	16	4	10	9	4	6	7	10			8	9	4		4	1	7	11
2014-04-20	front	14	2	18	14	12	9	7	7	11	11	9	9		10	8	4		8	20	7	8	2	1	19	8	11	5	14	11	6	11	5	9	5		14	8	12	7	5	4	13	2		7	4	15
2014-04-20	back	2		1				1		9	3		4		2	2	2		1	1	5	6	2		14	8			1	2	2	14	1	3	2		4	1	2		1	3					1	1
2014-04-21	front	5		7	5	5	7	4	1	4	1	4	5		5	7	10		1	9	7	7	3	2	1	8	3	8	5	13	3	18	3	4	4		3	10	5	1		2	5	3		1	6	5
2014-04-21	back	14		20		5	11	9	2	13	5	5	8		21	6	20		4	5	8	7	27	6	15	2	19		7	16	24	7	6	22	12		12	8	13	17	18	25	10	15		13	7	26
2014-04-22	front	5		2	5	3	6	1	1	1	2		2		4	3	11		4	7	10	10	7	2	4	7	2	7	4	5	6	10	5	2	2		3	3	3	3	6	4	4	3		2		1
2014-04-22	back		4	14	7		17	4	8	8	5	4	2		6	1	12			1		7	3	3		3	7		7	11	7		1	10	6		3		4	1	10	4	13	9	1		1	7
2014-04-23	front	3		1	6	2	3	3	3	6	9		2		6	4	3		11	1	9	18	9		6	3	8	13	12	6	3	2	1	2	7		5	3	6	2	3	4	4	4			5	4
2014-04-23	back		1	4	9	1	12	6	9	7	13	1	4		3		5		1		8	16	10	1	11	2	2		7	11	6	3		4	1		3	6	3	4	1		9	10	1	3	4	10
2014-04-24	front	6		5	4		5	11		13	13	1	5		3	6	1		4	2	3	5	2			2	1	5	10	4	5	10		5	23		15				1		8	2	2	6	18	15
2014-04-24	back			12	6		10	6	4	3	7	2	8		11		5		1		5	19	9		14	2	1		4	15	11			7	6		4		1	4	4	5	9	4				13
2014-04-25	front	10		9	6	1	2	14			6		1		2	9	1		2	4	3	9	1			1	2		1		8	1	2	1	6		3						9			17	8
2014-04-25	back	1		16	3		2	6	1	4	8	1	6		10	1	1				2	5	11		2	1	2		4	2	6	1		6			4		4	5	1	2	6	6	3			10
2014-04-26	front	1	7		1		8	4	1		2				3	2				1	6	4						1	1		6	3			4								10			6		4
2014-04-26	back			3	2		6	6	4	8	3				6		5					3	3		1					1	7			5	1		1		3	5		5	4	1	1			4
2014-04-27	front																																									1		1
2014-04-27	back	1			2		1	3	1	6	9	1	4		8		2					4	3		1		2			1	5			3			4			6		5	8	4	1		1
2014-04-28	front				1																													3	1							10		1
2014-04-28	back				1		3	9	4	8	6				8							8	2		1						3			6	5		5			8		7	5	4	1		1
2014-04-29	front						6															7	1						1					1				1				1
2014-04-29	back						8	5	1	14	5						1						3				1			4	2			3	1		1					1	3
2014-04-30	front						6		7													10	11							1				1			2			14		2		4
2014-04-30	back						14		2	6					3							1	5											1						1		2	6
2014-05-01	front								3										1			1	2		2				1								4			3	1	1		3
2014-05-01	back						1		1		1				1								5								1												3
2014-05-02	front								2								4					2	11														2			3				4
2014-05-02	back						1			2													1				1
2014-05-03	front								1								1				1		6		1												1	1		1		3		1
2014-05-03	back														1								1
2014-05-04	front																2																									7		2
2014-05-04	back
2014-05-05	front																						6		1															2		1		1			1
2014-05-05	back																						6
																							4																					1
																							3					4				2							3			14		2
Totals		149	144	210	155	121	214	147	119	196	183	65	124	4	184	113	140	0	115	134	159	250	215	131	177	140	140	129	152	150	192	148	116	193	140	6	163	111	114	147	93	191	204	127	55	130	125	186

## Sheet: Rep 3
		Cryptic female choice
DATE		cross
		Female Line 1					Female Line 2					Female Line 3							Female Line 5						Female Line 6					Female Line 7						Female Line 8					Female Line 9				Female Line 10
		F1xM1	F1XM7	F1XM8	F1XM9	F1XM10	F2XM1	F2XM2	F2XM3	F2XM7	F2XM10	F3XM1	F3XM2	F3XM3	F3XM5	F3XM6	F3XM8	F3XM10	F5XM1	F5XM5	F5XM7	F5XM8	F5XM9	F5XM10	F6XM1	F6XM2	F6XM6	F6XM8	F6XM9	F7XM1	F7XM2	F7XM5	F7XM7	F7XM8	F7XM9	F8XM1	F8XM3	F8XM7	F8XM8	F8XM10	F9XM2	F9XM5	F9XM6	F9XM8	F10XM2	F10XM3	F10XM8	F10XM9
2014-04-13			17	10	4	13		9	5	11	11	11	3	2	7		12		15	13		18	2	7	17		5	12	8	10		11		11	3	4	11	14	3			2	8	2		7	26
2014-04-14		7	17	14	16	26		12	11	8	5	12	7	9	11		10		7	6	3	3	29	9	5		5	8	11	3		3		5	3	11	12	7	14			11	6	6		6	8
2014-04-15		12	14	18	24	3		13	11	10	16	7	11	9	17		11		5	7		1	12	18	16		18	7	7	15	13	5		11	3	7	17	7	11		8	11	5	6	7	8	5	1
2014-04-16		14	16	8	26	10		5	10	20	10	12	4	9	13		8		9	9	12	7	8	14	15	2	15	10	8	14	7	13	11	17	11	14	20	14	10		8	9	8		14	14	16	8
2014-04-17		8	8	16	14	5		7	4	9	9	12	6	5	10		3		1	8	8	1	3	14	17		7	6	6	10	7	4	2	7	6	6	4	11	2			9	2		3	9	8	3
2014-04-18		11	24	16	14	10		24	7	2	8	15	7	6	8		9		7	6	9	1	6	18	7	9	13	8	10	9	8	11	5	16	8	17	16	11	11		6	4	18		2	5	14	5
2014-04-19		13	5	15	9	10	8	9	7	10	7	5	11		14	9			10	15	6	18	9	3	11	9	8	4	5	8	12	6	7	11	10		9	4	5	8	4	9	10	7	3	8	7	5
2014-04-20	front	13	14	21	10	12		11	6	4		9	8	7	15		6		4	5	1	1	23	12	6	8	11	3	10	3	11	8	31	4	5	4	3	2	4		6	16	3	1	14	2	9	15
2014-04-20	back			7					1				1		1		7			5					3		1	1		1	1			1		2	8	7	1		3				1	1	5
2014-04-21	front	10	2	12	3	9		1	3	3	1	6		3	5		7		3		1	1	4	2	4	3	4	8	5	3	8	8	12	4	3	1	4	10	8		3	3	2	2	5	1	11	10
2014-04-21	back		2	25	6	3		9	13			12	8	10	14		18			3			17		21		25		25		16		6	5		23	5	20	14		6		14		14	4	20
2014-04-22	front	9		9	1				1			4	4	4	3		7		2	1	2		7	5	7		3	8	1	4		5	2	8	2	5	5	2	2		5	4	8		7		12	4
2014-04-22	back			6	9	3			5				4	1	4		7		2	8			6		6		8		2		8		2	8		1	9	6	7		9		5	1	5	3	10
2014-04-23	front	5		2	2	5		3	12	1			6	4	2		12			1			2	5	2		4	2	3		2	1	6	3		1	2	6	1		1	9	7		1
2014-04-23	back			3	4	12			10			9	6	7	15		4		12	7			19		8	6	5	4	6		10		20	14	1	10	8	6	9		6		12		8	7	11	3
2014-04-24	front	1		5	3	3		4	15			4	3	7	6		6		1				3	1	4	1		2			2	3	6	4			8	1				11	3		2			1
2014-04-24	back			9	3			5	9			3	1	1	3		14		6	7			13		12	5	10		9		8		9	11		7		1	6		3		8		12	4	13	14
2014-04-25	front	2		1	4	6		7		15			1	1	9		6						8	3					1			1	1					1				4						1
2014-04-25	back			2	1	1			6			4	1	4	3		3		5	14			18		5	2	4		1		9		8	9		3	13	1	9				1		4	3	14	3
2014-04-26	front			2		5		1	15			6	1		2		2						7					1			1			1								1						2
2014-04-26	back				2	1		1	6			6	1		8		8		11				9			2	1	2	1		8		9	5		4	3	1	3				5		11	1	8	8
2014-04-27	front																1										1		1		2						1		1				1
2014-04-27	back				3				9			1		2	4		4		2	1			2				1	1			11		2	7		6	3	13	1		1				9	1	1	2
2014-04-28	front				7										2		13												10		8		2	3		1	9	4	8				5				1
2014-04-28	back				1			1	5			9		4	3		7			1			1			1	1		5		6			2		3	11		1		1		4		7	1		1
2014-04-29	front				3							3					3			7			2				2		1		1		3	6		8	2	6	8				1		1			2
2014-04-29	back				3				2					2	3		2										3							2		1	4	2					1		2
2014-04-30	front								1				6				10		7	8			2				5				1		11	2		1	6	2	4				1		1		1	4
2014-04-30	back				1				4			1					3		1							2			1		2			3			1						1		1
2014-05-01	front				3								1				6		15	2							1						2				3	1	3								1	11
2014-05-01	back								2								9									2					5			2											5
2014-05-02	front				4				1				1				5		5								1						2			1												4
2014-05-02	back
2014-05-03	front																2		2								2		1																			7
2014-05-03	back														1
2014-05-04	front														1		3		6								3		4		1		1
2014-05-04	back
2014-05-05	front																9										4		3				2			1												1
2014-05-05	back
					2												6		1										1							2			18
																	4		26										10
Totals		105	119	201	182	137	8	122	181	93	67	151	102	97	184	9	247	0	165	134	42	51	212	111	166	52	171	87	156	80	168	79	162	182	55	144	197	160	164	8	70	103	139	25	139	85	201	115

## Sheet: Rep 4
		Cryptic female choice
DATE		cross
		Female Line 1					Female Line 2					Female Line 3							Female Line 5						Female Line 6					Female Line 7						Female Line 8					Female Line 9				Female Line 10
		F1xM1	F1XM7	F1XM8	F1XM9	F1XM10	F2XM1	F2XM2	F2XM3	F2XM7	F2XM10	F3XM1	F3XM2	F3XM3	F3XM5	F3XM6	F3XM8	F3XM10	F5XM1	F5XM5	F5XM7	F5XM8	F5XM9	F5XM10	F6XM1	F6XM2	F6XM6	F6XM8	F6XM9	F7XM1	F7XM2	F7XM5	F7XM7	F7XM8	F7XM9	F8XM1	F8XM3	F8XM7	F8XM8	F8XM10	F9XM2	F9XM5	F9XM6	F9XM8	F10XM2	F10XM3	F10XM8	F10XM9
2014-04-13		6	5	9	4	10	22			6		4	13	8	16	6	16	2		8	2	3		5	4	8		4	3	24	1	1	1	3	16	2	3	3		8	6			1	5	8	15	6
2014-04-14		24	21	18	14	20	6			5		6	5	6	15	13	6	3	3	17	5	5	3	11	4	10	6	13	10	14	2	25	16	9	9	10	3	10	11	2	2	5	3	23	2	24	16	11
2014-04-15		9	9	9	12	4	14			7		9	9	8	3	7	5	5	9	10	6	3	6	15	11	1	12	4	10	5	9	6	5	5	2	15	6	11	6	5	8	7	7	7	5	5	6	3
2014-04-16		10	10	7	10	6	7			12		16	11	15	9	9	2	11	11	14	6	16	16	3	12	8	24	5	14	7	10	12	12	9	14	15	5	16	7	18	14	12	4	4	9	13	13	5
2014-04-17		3	10	7	7	6	8			6		8	8	7	7	7	2	1	12	7	3	6	5	11	3	4	16	1	8	9	11	6	2	6	5	8	9	5	5	11	4	9		12	8	4	7	9
2014-04-18		7	19	6	15	10	14			10		11	10	13	7	8		1	13	16	13	14	2	5	19	10	10	8	12	19	20	9	11	11	13	10	3	13	14	16	13	8		6	9	12	14	17
2014-04-19		5	9	13	14	21	14			13		9	6	8	5	12	2	1	10	8	9	13		6	7	2	10	2	13	11	16	9	26	13	13	13	8	6	6	9	4	13		4	3	6	14	16
2014-04-20	front	16	11	4	24	5	11			4		6	1	15	6	5	1		17	9	2	7		15	4	11	8	6	11	8	14	12	17	8	7	18	3	2	8	1	1	19		1	11	13	4	6
2014-04-20	back		1		1	3				1									1									1								1	4	1		4	2
2014-04-21	front	4	5	3	4	4	7			5		4	1	6	2	2	1		2	1		3		2	2	8	4	6	6		5	2	4	4	2	5	4		6	11	1	4		9	1	1	8	1
2014-04-21	back	2	15	25	20	26	21			12		10	14	8	19		3		2			19			26	5	11	9	1	2	1	17		1	7	6	16	4	1	5	12	18	1	36	2	6	8	21
2014-04-22	front	2	2	4	2	6	2			4		5	5	3	3	2			1			1		1	3	5		2	1	2	4	2	1	2	5	2	1	1	6	2	5	3		18	4	3	6
2014-04-22	back	1		6	2	4	1					1	3	4	4				2			6			1	2	8	3	2	5				5	10	8	4				3	9		5		3	13	5
2014-04-23	front	5	3	18	5	19	4			6		18	4	6	3					1		6		9	2		4			7	10	6		4	4	4	2	1	3	3	7	4		11	3	6	7	1
2014-04-23	back		2	9	8	6	14			6			7	6	5						21	13		1	6	3	2	4	4	12		7		8	7	9	7		10		1	15	4	10	1	17	8	7
2014-04-24	front	5	2	7	4	7	7			1		6	3	6	3	1				4		3		5			1	1	1	4	5	2		11	4	4			1		3	13		7	7	17	13	7
2014-04-24	back		4	6	6	2	14			11		1	7	11	7				1		15	10		12	7	1	4		2	10	1	8		6	7	5	1		11	3		13	4	12		12	15	9
2014-04-25	front		6	2	5	8	6			1		6	5	4	20									2	1	1					4	2	1	3		1						6		3	2	6	2	5
2014-04-25	back	1	1	1	4	1	12			6			4	4	3		1					12		9		3	5			10		2		2	1	4	4	5	4			7	1	14		9	13	1
2014-04-26	front		4	1	2	5	6					4	2	4	17												1				3			1	6	1			1		1					1
2014-04-26	back			8	2	1	13			4		1	5	4	5						4	12		4	1		4		1	10		2		4	7	2	1	8	7			4		6		3	18	1
2014-04-27	front									1				1											1		1	2
2014-04-27	back			2			10			5		1	4	3	6		3				6	9		3	1		4	2	3	5		2			6	5	1	4	5	1				4			9
2014-04-28	front				1					4			1	1			3					10			6												5	9						14	1
2014-04-28	back			5			4			6				1	2		2					1		9	5		2	1		8		3			1	6	1	17	7	1				2	1		1
2014-04-29	front						7			5				1								8														1	6	3						5		3	2
2014-04-29	back									7			3	9	1		1										8	2		11		2			2	1		2
2014-04-30	front			1			5			6				5	3							4		1	1	1		1		2							5	8					1	2
2014-04-30	back						9			2			4	3	4							2								2														5
2014-05-01	front						1							4										2					3								4
2014-05-01	back						4			2			2		14							4																1						1
2014-05-02	front						2								3						4			1					5								1	1						2
2014-05-02	back														5							11
2014-05-03	front																								1	2		2	1			3					1						2	1
2014-05-03	back																					13			1
2014-05-04	front						1																		2	4			1
2014-05-04	back
2014-05-05	front									1										1				1			1	1																5
2014-05-05	back
							1																		5				2			2			3		4							5
																																			2
Totals		100	139	171	166	174	247	0	0	159	0	126	137	174	197	72	48	24	84	96	96	214	32	133	136	89	146	80	114	187	116	142	96	115	153	156	112	131	119	100	87	169	27	235	74	172	212	131

## Sheet: Rep 5
		Cryptic female choice
DATE		cross
		Female Line 1					Female Line 2					Female Line 3							Female Line 5						Female Line 6					Female Line 7						Female Line 8					Female Line 9				Female Line 10
		F1xM1	F1XM7	F1XM8	F1XM9	F1XM10	F2XM1	F2XM2	F2XM3	F2XM7	F2XM10	F3XM1	F3XM2	F3XM3	F3XM5	F3XM6	F3XM8	F3XM10	F5XM1	F5XM5	F5XM7	F5XM8	F5XM9	F5XM10	F6XM1	F6XM2	F6XM6	F6XM8	F6XM9	F7XM1	F7XM2	F7XM5	F7XM7	F7XM8	F7XM9	F8XM1	F8XM3	F8XM7	F8XM8	F8XM10	F9XM2	F9XM5	F9XM6	F9XM8	F10XM2	F10XM3	F10XM8	F10XM9
2014-04-13		8	13		1	1	23	7	8	10	9	12	6	3	9		6			5	11	18	1	5			1					16		14	14	10	13	12	10	3	11	3	7		13	29	12	5
2014-04-14		10	8	2	18		9	5	21	8	9	20	18	26	24		7		15	21	7	9	5	10			32	4	2	11	17	10	14	1	4	9	7	4	4	7	17	15	11		7	13	7
2014-04-15		19	14	3	10		16	17	21	14	5	4	3	8	5		6		12	7	8	5	10	2			8	1	6	9	8	6	5	9	9	6	10	10	12	9	5	1	10	3	2	9	5	5
2014-04-16		20	12	32	18		19	11	6	8	3	9	25	12	6	8	11		4	9	13	8	10	9			7	1		7	9	9	8	11	10	14	11	21	9	17	6	4	10	3	11	10	8	3
2014-04-17		20	16	13	13		9	13	9	12	1	3	13	1	2	1	2		9	4	16	4		3			1	3		3	12	4	15	5	10	8		11	4	6	10	2	7	2	8	9	3	8
2014-04-18		17	20	18	23		14	7	26	22		10	21	7	21	8	8		11	13	1	10	10	16			12	1		9	14	11	8	11	8	13	11	11	17	14	9	1	13	4	8	12	13	9
2014-04-19		28	19	15	12		2	10	8	7		6	11	7	4	5	3		9	15	3	8	10	4			12	3		8	14	7	10	7	8	12	3	5	8	4	5		10	3	5	10	6	5
2014-04-20	front	17	9	18	15		11	5	10	13		1	5	9	9	8	5		19	14	1	12		3			6	2		15	11	6	7	7	1	7	3	8	9	10	3		5		5	5	5	7
2014-04-20	back	4	6	1			1															3																								5
2014-04-21	front	2	6	18	5		3	4	8	8	1	3			11	7	14		4	6		8	1	3			5	1	1	7	3	5		4	3	3	3	6	3	5	1		3		1	6	7	5
2014-04-21	back	28	10	4	13		14		1					21	19	5	14		16	5		33	3	11			11	5	1			1	1	12	3	19	23	18	22	28	9		8			14	34	15
2014-04-22	front	1	2	5	4		2		7	3				2	4	6	8		1	2		4		3			4	2		3	7	6	6	6	8	7		3	8	5	4		1	1	3	13	8	14
2014-04-22	back				9		9	1	4			1		10		4	4		2	1			5	6			11		1				4	15	6	7	12	2	2	6	3		7			17	9	7
2014-04-23	front	3	5	6	4		4	6	4	4		6		14	4	8	5	12	2	2		4					8			1	1	1	8	10	7	5	1	4	7	6			1			4	12	9
2014-04-23	back		4	3	9		10	13	17	15		3		12		13	18		13	3	4	10	7	9			7	2	1				6	12	2	9	7	14	11	8	8		9			11	11	9
2014-04-24	front	7		4	1		6	6	3	12		1		15	16	5	8		7			10		7			8		1	2	8	1	3	12		2	1		9	3	1		3			1	10	6
2014-04-24	back	1	14	2	16		9	12	4	15		13		9		11	7		12	16	11	21	6	1			7	1	2				3	6	1	8	8	12	3	14	7		8			7	3	8
2014-04-25	front	6		1	5		7	5	9	6		1		3	10	2	1		2			7		2			10			1	4			2		1			1								2	3
2014-04-25	back		2		6		1	4	1	6		1		4		7	4		9	9	5	6	4	4			4	2	2		1	1	2		1	6	7	5	5	4	6		5			8	3
2014-04-26	front	1	1	1	7		6	1	15	1		3			10	3			1	6		3		1							1			1					1		1					2	2	4
2014-04-26	back		2	1	12		1			3				3		6	3		10	8	10	6	2	8			12	1	2				3		1	7	4	9	5	3	9		4			2	1
2014-04-27	front															1											1												1
2014-04-27	back		2		2					1		1		1		1	3		17	3	6	10	3				6		3						2	7	1	12	2	3	4		3
2014-04-28	front															6	1										10									3		11	15				5
2014-04-28	back		2		5			1								3	1		5	3	8	9	1	4			3		2				2			3		4	10	3	2		2
2014-04-29	front											5				4	2										5											2	4				8
2014-04-29	back		3		2												1				3	2		4			4		1							8		2	9	5	1		2
2014-04-30	front		1					3								3	3		17	1			1	1			1		1								2	4	2				2
2014-04-30	back		1		2											6	1		3					2			5		1							3		4	3	4			7
2014-05-01	front		1					3								3			13		1						4						5					5	2				1
2014-05-01	back				4											5			6	2							6									4		2	3
2014-05-02	front							1	1							1	1		4		1						7											5	4				5
2014-05-02	back																		6		1	4														2		1	1				9
2014-05-03	front							1								3			2		3						3												3				1
2014-05-03	back																		4			17					2																1
2014-05-04	front															3					4						3						1						13				1
2014-05-04	back
2014-05-05	front																				1						2												6
2014-05-05	back															1																							7
																3	1		12		1						42												3
																																							2
Totals		192	173	147	216	1	176	136	183	168	28	103	102	167	154	150	148	12	247	155	119	231	79	118	0	0	270	29	27	76	110	84	111	145	98	183	127	207	240	167	122	26	169	16	63	187	161	122

## Sheet: Rep 6
		Cryptic female choice
DATE		cross
		Female Line 1					Female Line 2					Female Line 3							Female Line 5						Female Line 6					Female Line 7						Female Line 8					Female Line 9				Female Line 10
		F1xM1	F1XM7	F1XM8	F1XM9	F1XM10	F2XM1	F2XM2	F2XM3	F2XM7	F2XM10	F3XM1	F3XM2	F3XM3	F3XM5	F3XM6	F3XM8	F3XM10	F5XM1	F5XM5	F5XM7	F5XM8	F5XM9	F5XM10	F6XM1	F6XM2	F6XM6	F6XM8	F6XM9	F7XM1	F7XM2	F7XM5	F7XM7	F7XM8	F7XM9	F8XM1	F8XM3	F8XM7	F8XM8	F8XM10	F9XM2	F9XM5	F9XM6	F9XM8	F10XM2	F10XM3	F10XM8	F10XM9
2014-04-14		1	3	7	1		6	2	11	1		7				6		3	6		6	17	6		5	4			6	5		4	5	12		5	5	9	1	1	3			1		4	7
2014-04-15		7	12	15	18	16	15	14	14	3		20				17		12	13	16	20	11	20	25	5	6	11	2	17	2		10	6	12		10	8	12	2	18	9	11	14	6	9	28	11
2014-04-16		11	16	10	9	15	15	3	18	3		15				5		6	2	1	5	7	7	11	6	4	4	3	4			11	4	1	20	13	4	3	14	4	8		6		4	11	6	19
2014-04-17		7	14	13	2	6			9	3	9	8			2	6		2	5	2	4	7	9	9	4	8	8	3	3	1		2	3	7	3	1	3	4	9	6	3	3	6	2	3	8	3	5
2014-04-18		7	14	11	8	9			5	6	12	4			7	8		9	12	6	11	7	9	10	4	7	8	16	4	3	5	10	14	9	17	7	14	6	10	1	19	8	12	3	10	7	6	10
2014-04-19		11	8	21	10	13			12	5	7	2			8	11		10	6	5	12	8	17	4	1	7	11	16	5	3	4	10	8	12	18	7	14	9	11	10	11	5	3	13	7	8	10	5
2014-04-20	front	25	27	35	7	22			19	9	7	11			11	7		9	2	10	18	17	17	4	3	1	12	19	7	8		9	27	1	17	2	6	2	4	16	6	5	11	6	10	14	4	11
2014-04-21	front	17	16	9	3	22	15		11	3		4			8	3			3	7	5	10	7		4	3	11	12	2	4			7	6	6	1	6	5	6	1	4	2	11	9	4	12	4	16
2014-04-21	back		8	3		3			1											1		3	1		1	2		1					1		1		1				2	1	1			3	1	1
2014-04-22	front	12	3	1	3	11	8		2	2		4			10			5	3	3	1	3			8	2	4	2	2			3	2	6	2	2	6	3		1	1	3	3	3		5	8	7
2014-04-22	back	6	15	18		30	10		9							10		3	3	11		11	19		17	4	1	6	15			9	9	9	3		24	5	10	7	32	5	25	17		18	20	32
2014-04-23	front	10	7	3	2	11	2		2	3		4			10			2	1	2	3	4	2	1	4	5	6	5	1			10	7	8	4	1	7	4	3		6	6	3	7	10	4	9	5
2014-04-23	back	18		10		10			4						8	4		7		6			1		3		7	5	2	1		10	9	9	9	5	1	6	3	13	3	17	14	1	1	4	8	3
2014-04-24	front	7	5	6	3	6	7		2	2		6			9	11			1	4	2	4	4			5	4	4	2			3	4	5	1	1	15	7	3	7	5	4	4		6	6	1	9
2014-04-24	back	22	5	3		12	3		7						13	10		2	11	12		2	4		4	1	8	3	4			9	14	6	13		13	4	17	14	13	7	6	14			2	4
2014-04-25	front	7	2	4	1	3	8		8			6			1	4			1	8	1	4	12			2	3						3		1		4	2		1	2	4	6	1	2	10	2
2014-04-25	back	7	2	4	1	16	1		3						4	3		3		5	8	15	4			1	1	2	2			16		7	10		5	1	6	5	3	6	6	4			5
2014-04-26	front	3	1	8		1	6		4			1								4		7	2				3	3	2				3	2	1		1			1		1	3		1	8		1
2014-04-26	back	2				16	2		1						4	5					4	3	6			2		2	3				1	3	3		2	2	6	2	9	3	4	5
2014-04-27	front	1		5	3	4			6						2			9		12		11					4					1	2				3	2					2			4
2014-04-27	back					4	2		3						8	7				4		4	1				10	3	3				1	2	9		4		5	3	6	5	4
2014-04-28	front																																						1	1			1	1
2014-04-28	back			1		8	6								8	2				6	2				3		4	1	2			3					3			2	7	4	1	5				4
2014-04-29	front														10	4													4			3		1	1				4		6	3		4
2014-04-29	back		1	1		1	2		1						6	3				1	3	1			1		1	2	1					1	1		3		3		1	3	2	2				1
2014-04-30	front		7			19									7	5							1		3				5			1		4					2	4		7		8
2014-04-30	back		1			1			5						2	6					1	1					2	2							2		1		3	4	3	3	1
2014-05-01	front		4			16	1		2						8	3					1	1	3		1			2	4			3		7						4		3		3
2014-05-01	back					2									1																				2						4	4	10	1
2014-05-02	front			2		1									5	2					2	1	1		1			1				2		5						2		1
2014-05-02	back								1						5												2	2														2	4
2014-05-03	front	1	3			14			1						3	4					1		1						2					2						9				4
2014-05-03	back														1	1											1																1
2014-05-04	front	1				4									4	5							4									1						1		4				3
2014-05-04	back		1												1												1												1
			1												13	2					1	1	1						1			1		1			1			3				8
			7			2									12	1										1			2								10			11				8
						2									4	3									1				3					1			2			4			1	3
			3			2																						1									2			1				1
Totals		183	186	190	71	302	109	19	161	40	35	92	0	0	195	158	0	82	69	126	111	160	159	64	79	65	127	118	108	27	9	131	130	139	144	55	168	87	124	160	166	126	165	143	67	154	107	133

## Sheet: Rep 7
		Cryptic female choice
DATE		cross
		Female Line 1					Female Line 2					Female Line 3							Female Line 5						Female Line 6					Female Line 7						Female Line 8					Female Line 9				Female Line 10
		F1xM1	F1XM7	F1XM8	F1XM9	F1XM10	F2XM1	F2XM2	F2XM3	F2XM7	F2XM10	F3XM1	F3XM2	F3XM3	F3XM5	F3XM6	F3XM8	F3XM10	F5XM1	F5XM5	F5XM7	F5XM8	F5XM9	F5XM10	F6XM1	F6XM2	F6XM6	F6XM8	F6XM9	F7XM1	F7XM2	F7XM5	F7XM7	F7XM8	F7XM9	F8XM1	F8XM3	F8XM7	F8XM8	F8XM10	F9XM2	F9XM5	F9XM6	F9XM8	F10XM2	F10XM3	F10XM8	F10XM9
2014-04-14		12	3	6	2	9	11	1	10	11	6	5	17		2	4	3		3		1	20		15		10		18	6	26	1	13	2	15	6	12	10	4		6	2		2		10	9		4
2014-04-15		21	11	10	7	23	7	13	13	16	4	12	12		3	26	7		20	24	31	24	7	22	5	9	8	3	10	15	1		17	8	13	6	2	15	3	13	2	3	8	1	9	1		9
2014-04-16		13	23	9	14	14	25	17	17	9	20	9	6		3	1	7		13	9	5	4	27	13	8	4	6	4	5	3	16	5		8	6	9	6	9	3	9			2	3	3	7		5
2014-04-17		11	7	19	5	7	1	9	8	9	16	7	2		4	10	7		3	3	7	8	8	6	12	9	4	1	2	2	2	8	6	3	5	4	7	5	11	4	3	3	4	3		6
2014-04-18		10	21	12	17	15	6	2	14	5	24	11	3		5	7	12		4	10	9	5	16	12	5	6	9	14	8	7	2	17	15	10	14	6	9	11	13	12	5	2	4	8	1	5		4
2014-04-19		12	26	12	26	19	5	16	8	26	20	10	1		4	13	8		18	12	13	8	14	16	7	3	6	4	17	8		16	11	6	11	9	3	4	11	9	6	2	1	12	1	13		6
2014-04-20	front	21	24	17	20	25	4		2	14	17	18	15		2	13	4		16	15	11	6	25	18	4	3	13	8	5	2	1	3	6	3	8	3	8	8	10	9	5	1	3	6		9		7
2014-04-21	front	6	20	9	16	12	3	6	6	3	10	4			6	6	3		14	13	13	1	22	12	6	7	4			4		7	1	3	3	2	3		8	2	13	2	4	6		6		6
2014-04-21	back	1		3	2					9	1								1					1				5		2						1	1
2014-04-22	front	2	17	4	8	8	1	4	1		8	3			3	1	1		2	1	10	3	8	10	2	5	3	3	1	9		6		7	3	2	4	2	9	3	4	2	3	1	1	2		1
2014-04-22	back	18	13	23	11	9	3		1	4	21				3	12	8		5	9	6	10		18		14	7	19	6	10		1		5	1	1	1		10	2	14		9	12		1
2014-04-23	front	4	8	4	4	8		7	4	4	3	2			3	3	3			4	7	5	5	8		7	2	15	6	3		3		9	5	1	6	7	5	12	4		16	2		2		8
2014-04-23	back	5		9		12	3		2	3	2				3	9	4			13	6	15		6		8	16	2	2	1		1		7	12	6	8	10	6	2	2		14	7				1
2014-04-24	front	5	4	9	2	5	2	10		4	5	3			2	6	4		2	5		7	1	7		6	4	13	5	2				11	2		1	7	4	11	3		5					3
2014-04-24	back	2		14	6		3		2	10	2				5	11	13			19	18	17				3	5	15	6	6		4		12	4	8	16	14	3	3	7		19	10		2		11
2014-04-25	front	3	2	5	2	6		5	2	5	2					2			3	7	7		1	5		1	4	2	1	1				2	2	1			4	6	2		1			2		1
2014-04-25	back		1	16	14	3	1		2	3	3				4	5	6			5	4	4	2	3		2	3	3	2	6		5	14	6	3	2	3		3	1	15		7	3		10		3
2014-04-26	front	3	2	4	2	5		5	2	6	7					8			10	10	7	1		5										1				2
2014-04-26	back		1	3	8				5	10	2				5	5	4			9		1	3			7	5	1		3		3	3	3	5	2	3	8			2		8	1		4		7
2014-04-27	front	4		1		5		4								8			6	5				4	1		1	1											2
2014-04-27	back		1	3	1	1			4		5					9	5			11	2	1				2	4	9				10	8	1	4	1	3	7	2		8		5			1		1
2014-04-28	front																															1		1				1	1
2014-04-28	back			2	2		1		1	2	1				1	9	4			3						3	2	6						4	10	2	5	6			2		1	5		11		1
2014-04-29	front		1														1														11	2		3	4			1	2		10			1
2014-04-29	back		1	4	3				5		1					7	3			2			1			5	2					6		1	2	1		1			2			3		5		2
2014-04-30	front									1																4						17		2	11			11	3		4			4
2014-04-30	back			4			1			1						2	1						1			8		3				2		1	5	3	1				5			2		7		1
2014-05-01	front		5						2	13																		1				5	7		6		5	3	4		11					8
2014-05-01	back				1				1							1																1			4						6
2014-05-02	front		1						4	3																3						1	4	2	3		2	2	3		5			2		1
2014-05-02	back															4	1																					1			4
2014-05-03	front								1																	1		1				4			2		4	2	4		3			1		2
2014-05-03	back			1						1																															2
2014-05-04	front																											2				2	1	2	1			2	6		3					1
2014-05-04	back																						1												1
																	1									2	1	3				2	1	3	1		2	2	4							1
																									1	3		3				2						5	5
																							1					2				2		2	6		4	8	3							1
																																2		1	1			2	9		1
Totals		153	192	203	173	186	77	99	117	172	180	84	56	0	58	182	110	0	120	189	157	140	143	181	51	135	109	161	82	110	34	151	96	142	164	82	117	160	151	104	155	15	116	93	25	117	0	81

## Sheet: Rep 8
		Cryptic female choice
DATE		cross
		Female Line 1					Female Line 2					Female Line 3							Female Line 5						Female Line 6					Female Line 7						Female Line 8					Female Line 9				Female Line 10
		F1xM1	F1XM7	F1XM8	F1XM9	F1XM10	F2XM1	F2XM2	F2XM3	F2XM7	F2XM10	F3XM1	F3XM2	F3XM3	F3XM5	F3XM6	F3XM8	F3XM10	F5XM1	F5XM5	F5XM7	F5XM8	F5XM9	F5XM10	F6XM1	F6XM2	F6XM6	F6XM8	F6XM9	F7XM1	F7XM2	F7XM5	F7XM7	F7XM8	F7XM9	F8XM1	F8XM3	F8XM7	F8XM8	F8XM10	F9XM2	F9XM5	F9XM6	F9XM8	F10XM2	F10XM3	F10XM8	F10XM9
2014-04-14		1	12	3	3	8	11	8	24	8	9	8	6			8	13		4	4	9	23		20	4	15	2			12	12	12	5	16	13	7	4	16				4	1	4	10	13	7
2014-04-15		12	14	3	8	15	12	8	13	7	8	6	2			5	10		33	9	18	12	1	7	13	5	9	7	1	17	10	13	6	13	10	8	15	10	9			12	7	4	13	7	9
2014-04-16		19	15	10	13	10	4	14	18	17	16	9	7	6		4	11		11	5	4	13	20	8	8	12	9	7	19	8	24	20	16	5	11	6	4	8	4		6	10	7	4	2	4	6
2014-04-17		11	9	12	6	13	4	7	4	6	3	14	7	4	1	4	3		6		12	9	2	2	2	2	4	6	4	6	7	7	11	6	12	7		5	8		5	5	6	5	4	4	6
2014-04-18		18	14	10	13	9		21	8	19	14	12	8	7		8	5		11	3	7	10	12	3	14	11	16	5	8	5	7	12	8	14	12	4	3	7	8		6	12	5	10	5	7	10
2014-04-19		24	10	18	12	17	4	9	10	11	21	10	7	9	1	3	5		13	4	14	11	12	5	7	2	4	10	11	10	16	9	14	3	8	5	9	6	11		7	5	8	3	15	9	12
2014-04-20	front	13	20	15	20	31		13	3	17	7	12	9	16		7	10		26	4	13	20	36	4	14	11	21	6	15	19	11	9	15	6	11	6	1	3	11		10	15	4	10	4	9	2
2014-04-21	front	18	12	7	8	9		5	3	12	20	5	2	8		2	3		16		10	7	25	3	1	5	5	6	12	4	8	8	11	2	7	5	6	1	4		8	5	3	5	7	8	6
2014-04-21	back				1	1			1		2	3	1				1					1									1			1				1	1		2			1
2014-04-22	front	17	5	3	4	1		5	1	7		3	2	3		2	7		7	4	4	7	15	4	1	1	4	5	6	2	6	5	2	7	5	2	10	11	2		6		4	1	3	6	6
2014-04-22	back	13		11	15	18		3	1	10	11	16		4	1		13		1			16	27		5	3	6	28	2				1	8	6	15		2	6		9	13	5	5		16
2014-04-23	front	16	13	1	5	2		2	1	6	6	2	6	7		3	4		4	1	4	7	17	2	1		3	8	3	1	7	4	7	4	4	3		4			2	1	7	2	9	7	7
2014-04-23	back	2		1	4				4	1	5	8		5			4		1	4		8	7		7	1	11	8	5					2	2	4			2		1	4	6	3		2
2014-04-24	front	7	3	2	1	2		3		4	3	7	5	5		9	15		1		6	4	3	1	7	1	3	10	4	11	4	11	1	5	9	2			1		4	2		3	4	11	1
2014-04-24	back	13			9			8	5	17	11	13		11			9			11		10	11		7		8	10	4					13	3	6	2		1		6	14	5	7		6	2
2014-04-25	front	3	1	1	3	4		1		7	5	3				5	7		1				2		2		8	5	1	12	5	1	4	3	4							8	1			7
2014-04-25	back	4	1	4	10	8		7	2	1	3	6		10			2			9		10	6		8	3	2	1	1					10	2	3	13	1	1			8	5	8			7
2014-04-26	front	6	3		2	3		4		3	1	6		11		1	1					3	10		1		4	2	1	6	5	5	4		1	1						12	2			1
2014-04-26	back	1		2	1	10	1	9	1		6	2		7			2			3		9	16		8	3	7	7	3					6	2	1	2					6	3	5			2
2014-04-27	front	3	2		1	5		1		11	1			4					1			2	3						3			2	7	1
2014-04-27	back				2			7	3		6	12		6			3			1		14	11		2	3		1	2					15	2	5						4	3	10			2
2014-04-28	front
2014-04-28	back	1		1	1			2	6	1	1	9		3			3					6	24		7	2	6	2						3		5	2		2			5	6	4	1
2014-04-29	front							6				1		1			2			1			7		2		3							12		5							3	3
2014-04-29	back			3				4			1						1					1	2		9		1	4	2					3		2			1			5	1	3
2014-04-30	front							1	4			2		1			1			1			6				1							10									1	2
2014-04-30	back							2	1			2		6											1			6	2					7								3	1	3
2014-05-01	front			5					6	1	6	5		2			1			1			14		3		3	3						2		3							3	5
2014-05-01	back													4								1					8	4						1								3
2014-05-02	front							1	5		2	10		2									15		4		2							1		1	9					2	3	4
2014-05-02	back																																	1								19
2014-05-03	front			4				1	5			7		1						1			3		2		1									2	1						4	5
2014-05-03	back							2																																		6
2014-05-04	front								4					3									1		2		2															1	2	2
2014-05-04	back																								1									1								2
					5				1			1					3										1							1		1								4
									2										2						1		1									2						2	1	10
									3								3								3		1										4							5
Totals		202	134	116	147	166	36	154	139	166	168	194	62	146	3	61	142	0	138	66	101	204	308	59	147	80	156	151	109	113	123	118	112	182	124	111	85	75	72	0	72	188	107	140	77	117	85	0

## Sheet: Rep 9
		Cryptic female choice
DATE		cross
		Female Line 1					Female Line 2					Female Line 3							Female Line 5						Female Line 6					Female Line 7						Female Line 8					Female Line 9				Female Line 10
		F1xM1	F1XM7	F1XM8	F1XM9	F1XM10	F2XM1	F2XM2	F2XM3	F2XM7	F2XM10	F3XM1	F3XM2	F3XM3	F3XM5	F3XM6	F3XM8	F3XM10	F5XM1	F5XM5	F5XM7	F5XM8	F5XM9	F5XM10	F6XM1	F6XM2	F6XM6	F6XM8	F6XM9	F7XM1	F7XM2	F7XM5	F7XM7	F7XM8	F7XM9	F8XM1	F8XM3	F8XM7	F8XM8	F8XM10	F9XM2	F9XM5	F9XM6	F9XM8	F10XM2	F10XM3	F10XM8	F10XM9
2014-04-14		5	13			9	14		8	13						5	10	2	2	2		5	4	4	14	14	1	16	6	10	11	14	12	3	3	2	6	9		9	1		4	1	7
2014-04-15		20	15	5	12	11	6		11	14				11	4	11	5	5	13	12	14	5	16	11	7	2	6	5	10	5	7	7	12	7	23	7	4	6	22	6	4		17	3	8
2014-04-16		20	14	4	24	9	15	9	13	9	18			5	6	6	6	12	4	12	4	2	8	4	10	11	14	2	6	2	12	10	9	3	3	8	10	12	5	11	5	1	9		4
2014-04-17		7	6	2	8	3	1	9	3	2	5			4	7	3	5	7	3	7	2	6	10	6	7	5	8	8	10	2	15	10	10	9	10	8	3	6	8	9	4	3	2	1	4
2014-04-18		13	10	2	15	21	14	8	21	9	10			13	7	11	6	15	6	18	7	10	14	9	15	24	10	10	11	17	8	9	13	4	11	13	6	5	18	10	5	4	10	3	8
2014-04-19		17	14	10	20		7	6	8	10	12			18	8	5	7	10	5	13	9	7	6	8	10	4	16	21	3	13	7	11	11	8	12	8	5	9	7	10	9	10	12	5	13
2014-04-20	front	15	19	1	24	26	2	8	9	7	15			7	10	6	9	8	14	15	16	10	24	11	9	7	20	26	4	9	5	10	14	3	19	17	10	4	12	11	8	15	7	1	9
2014-04-21	front	8	9		14	8	7	7	15	6	14			3	14	1	2	12	6	8	4	8	9	4	2	3	5	1		2	2	6	22	4	12	3	6	2	2	9	9	4	8	5	5
2014-04-21	back						3		7							1		2						1	1				1	5	1					1	2	2	1
2014-04-22	front	7	7		11	2	2	2	6	3	12			2	8	3	1	8	5	7	7	6	3	2	6	1	14	4	2		1	4	2	7	6	4	2	2	5	1	4	4	2	3	2
2014-04-22	back	17		1	22	17	3		12		4			4	4	8	4	17	6	13	7		15	16	18	6	7	16	2	2	6			18		8	9	6	28	1	2		8	8
2014-04-23	front	6	2		10		1	1	1	5	4			5	4	4	2	4	5	1	8	19	6	4		4	3	3	6	1	3	4	5	13	6	4	5	3	9	3	2	4	2	2	10
2014-04-23	back	5	6		3	2	8		13	5	2			11	1	3	4	5	3	7	9	1	9	7	6	2	13	7	11	3	6			25		5	4	1	8	11	3	10	12	1
2014-04-24	front	6	2		8	2	10	3	3	9	6			6	2	6	1	6	3		4	9	8	4	10	3	5	6	6	7	5	8	7	23	6		3	1	13	5			7	1	2
2014-04-24	back	21	4	1	19		14		17	22	13	1		7	15	9	9	8	23	7	8		13	9	10	9		5	9			1	1	14		5	5	2	11	7	3	9	14	10
2014-04-25	front	2	4		5	3	15	1	5		2			6	6			2	3	1	1	2	2	1	9	2	4	13		15	1	4		12	2		1		12	7			10
2014-04-25	back	2	1		6	1	2	1	10	5	18			2	6	7	2	9	9		1		3	8	17	1	12	9	7	1	1			5		2		1	3	2	4	1	8	7
2014-04-26	front	4	6		4		7		1		7			5	2			7		1	1	6	2	2	1	1	3	1		16		1		4	2		1		5	3			6
2014-04-26	back	7	7		18	1	10	2	3	3	14				9	8	3	7	2		5		6		6	3	2	10	4					7		4	2		5	2	6	3	2	5
2014-04-27	front	4	2		5		2			1	9				1			3	1	1			4	1	2		11			3				2	3
2014-04-27	back	11			4					2	16				2	4	4	9	1		4		5	1	10		8	7	1					9		12	2		8	2	1	9	5	6
2014-04-28	front																																			1		1
2014-04-28	back	1	1			3	2			3	8			2	1	2	4	6	9		1		3		5		1	3	4		1			5		7	8	3	4	2		6	4	5
2014-04-29	front	9	2		19	1	3		1						2	3			1																	9	9					1
2014-04-29	back		2		4				2	1	8				5	2	1	2	2					2	4	2	4									6	8	1	4			6	6	3
2014-04-30	front	10			7		1				1					9			11							2									5	11	3					11
2014-04-30	back	1			1		3		3		9			3		3	1	2	3		1		2		1		4	4								7	4		3			4	5	2
2014-05-01	front				2		1		5						6	5			9					1		1										4	2	2				10
2014-05-01	back				3				1		7				1	7	2		7					1	3	1										1			2				2
2014-05-02	front	2	1		3			2	4		1				4	4	1		2							1									2	6	2	1				3
2014-05-02	back				19						2			1	1	1			1																	1			1			2
2014-05-03	front	3	1		11			1	11							3			6							3			1							4	1	4				10
2014-05-03	back				7			1			6					2			1									1								1						1
2014-05-04	front		2		7				5			3			2	6	5		4							2												6				7
2014-05-04	back				4						7	1							1
		1	2		6				6			2			4	5			4							2			3									4				9
			6		7				4						1	4			5							1												3						8
																12																						15
Totals		224	158	26	332	119	153	61	208	129	230	7	0	115	143	169	94	168	180	125	113	96	172	117	183	117	171	178	107	113	92	99	118	185	125	169	123	111	196	121	70	147	162	80	72	0	0	0

[truncated: 11 more sheets: Rep 10, Rep 11, Rep 12, Rep 13, Rep 14, Rep 15, Rep 16, Rep 17, Rep 18, Rep 19, Rep 20]
